# Supplementary figures and images for: A clinical trial with a novel collagen dermal substitute for wound healing in burn patients
Source: Royal Society of Chemistry journal article supplement (doi:10.1039/c9bm01209e), 2019-11-08

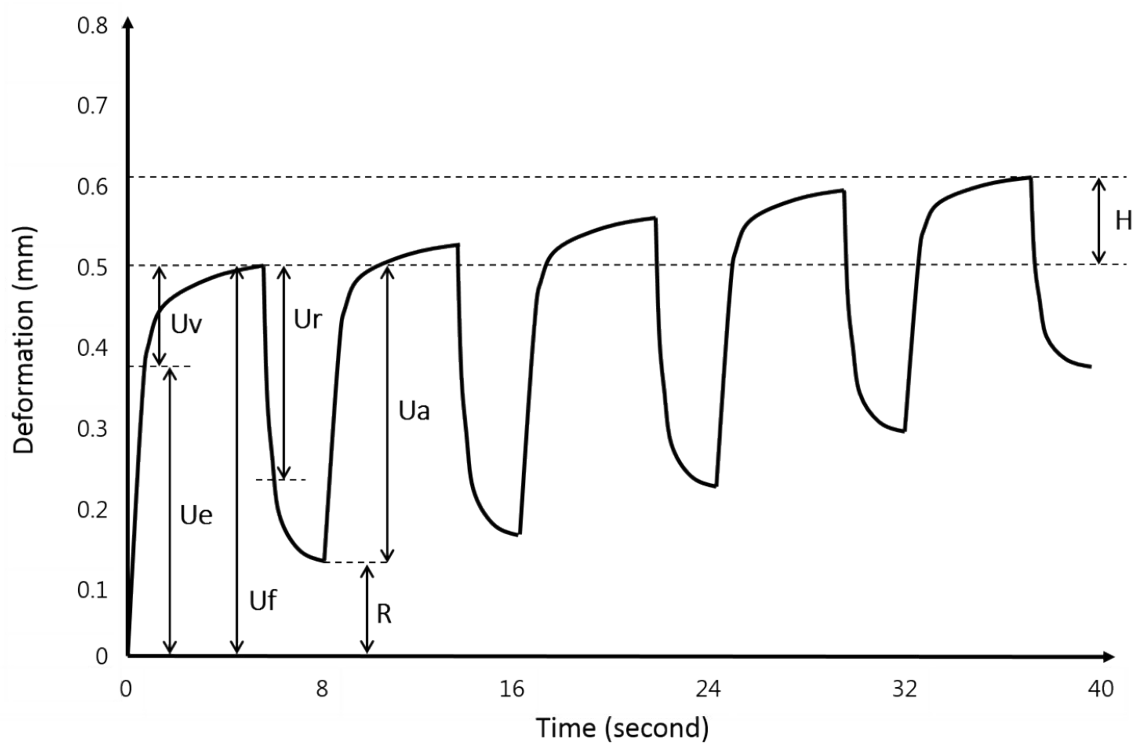

Supplement: c9bm01209e1.pdf [file c9bm01209e1.pdf]



|  |  |  |  |  |  |
|--|--|--|--|--|--|
|  |  |  |  |  |  |
|--|--|--|--|--|--|

Supplement: c9bm01209e2.pdf [file c9bm01209e2.pdf]
